# Supplementary material
Source: PubMed Central journal article supplement (PMC3957617)
Supplement: AEM.03523-13_zam999105155so1.pdf [file AEM.03523-13_zam999105155so1.pdf]

**TABLE S1**

The quantitative results of activity of crude lysate of *E. coli*<sup>a</sup>.

| <i>E. coli</i> BL21              | Total activity (U) | Protein (mg) | Specific activity (U/mg) |
|----------------------------------|--------------------|--------------|--------------------------|
| Empty vector control             | 78.1               | 8            | 8.8                      |
| Vector harboring <i>RmAsnase</i> | 43,506.4           | 35.8         | 779.7                    |

<sup>a</sup>Enzymatic reactions were carried out for 10 min at 45 °C in 50 mM phosphate buffer (pH 7.0) as described in the text.

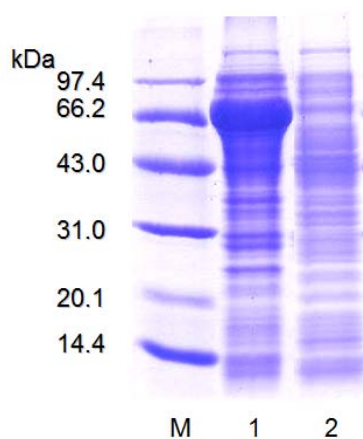**FIG S1**

SDS-PAGE analysis of crude proteins expressed in *E. coli*. Lane M, low molecular weight protein markers; lane 1, crude lysate of *E. coli* harboring *RmAsnase* in pET-28a (+) vector; lane 2, crude lysate of *E. coli* with an empty pET-28a (+) vector.
